# Supplementary material for: Bursty emission of whistler waves in association with plasmoid collision
Source: Copernicus journal article supplement (doi:10.5194/angeo-35-885-2017), 2017-07-31
Supplement: Supplementary file 1 [file angeo-35-885-2017-supplement.zip]

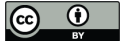

## *Supplement of*

# **Bursty emission of whistler waves in association with plasmoid collision**

**Keizo Fujimoto**

*Correspondence to:* Keizo Fujimoto ([fujimoto@buaa.edu.cn](mailto:fujimoto@buaa.edu.cn))

- [angeo-35-885-2017-supplement-title-page.pdf](#)
- [ms01.mpg](#)

The copyright of individual parts of the supplement might differ from the CC BY 3.0 License.
